# Supplementary material for: Synthesis of controlled-particle-size boehmite for coating lithium-ion battery separators
Source: Royal Society of Chemistry journal article supplement (doi:10.1039/d2nj04947c), 2022-12-09
Supplement: d2nj04947c1.pdf [file d2nj04947c1.pdf]

## Supporting Information

### **Synthesis of controlled-particle-size boehmite for coating lithium-ion batteries separator**

*Yongyu Yang<sup>a</sup>, Peng Tian<sup>a,b\*</sup>, Tingting Gao<sup>a</sup>, Jingang Xu<sup>a</sup>, Qianjin Xu<sup>b</sup>, Hongchang Pang<sup>a</sup>, Junwei Ye<sup>a</sup>, Guiling Ning<sup>a\*\*</sup>*

a. Dalian University of Technology-Baohong Technology Lithium Battery New Materials Joint Research Center, School of Chemical Engineering, Dalian University of Technology, Dalian 116024, Liaoning, PR China

b. Jiangxi Baohtec Nano Science Co Ltd, Yichun, 336000, Jiangxi, PR China

\*Corresponding author. E-mail address: [tianpeng@dlut.edu.cn](mailto:tianpeng@dlut.edu.cn)

\*\*Corresponding author. E-mail address: [ninggl@dlut.edu.cn](mailto:ninggl@dlut.edu.cn)

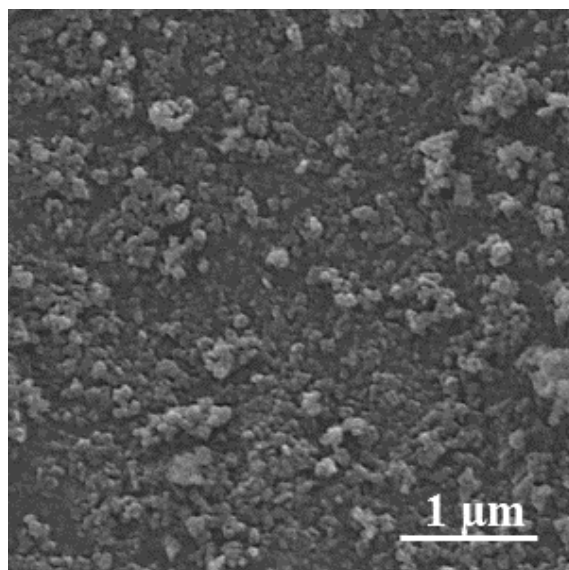

Fig. S1 SEM image of hydrothermal product of pseudo-boehmite.

Table S1 The boehmites' particle size distributions

| No.    | D10 / $\mu\text{m}$ | D25 / $\mu\text{m}$ | D50 / $\mu\text{m}$ | D75 / $\mu\text{m}$ | D90 / $\mu\text{m}$ | D97 / $\mu\text{m}$ |
|--------|---------------------|---------------------|---------------------|---------------------|---------------------|---------------------|
| BM-2   | 1.349               | 1.622               | 2.021               | 2.536               | 3.092               | 3.710               |
| BM-1   | 0.718               | 0.811               | 0.961               | 1.199               | 1.457               | 1.685               |
| BM-0.7 | 0.502               | 0.588               | 0.722               | 0.967               | 1.243               | 1.442               |
| BM-0.5 | 0.488               | 0.559               | 0.661               | 0.809               | 1.062               | 1.384               |
| BM-0.3 | 0.049               | 0.082               | 0.562               | 0.766               | 1.083               | 1.420               |

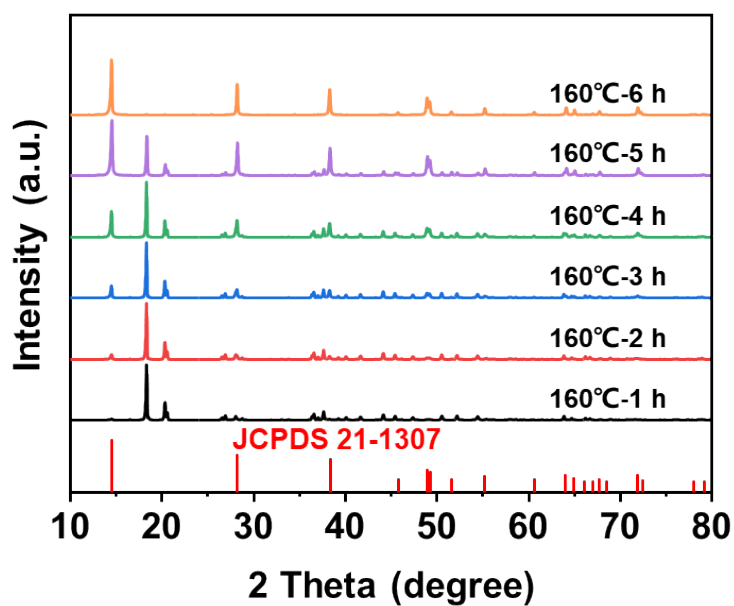

Fig. S2 XRD patterns of samples obtained under different reaction time at 160°C.

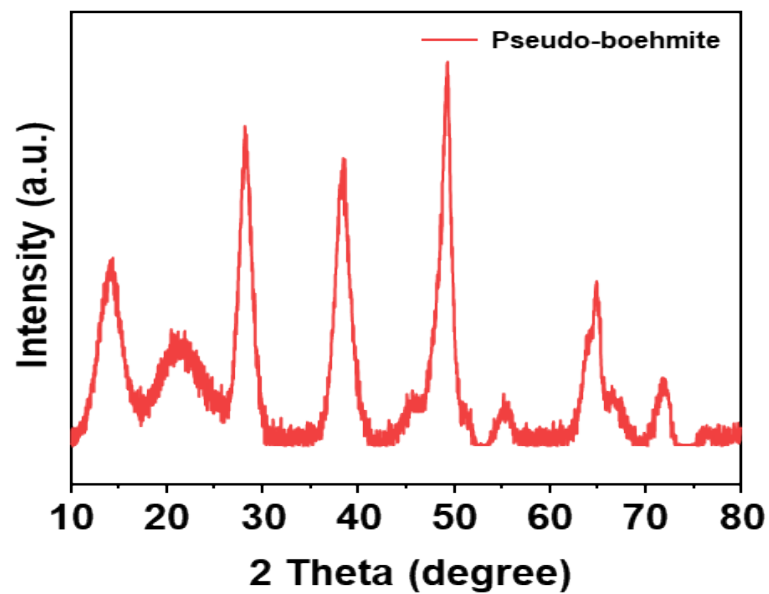

Fig. S3 XRD pattern of pseudo-boehmite (crystalline seeds).

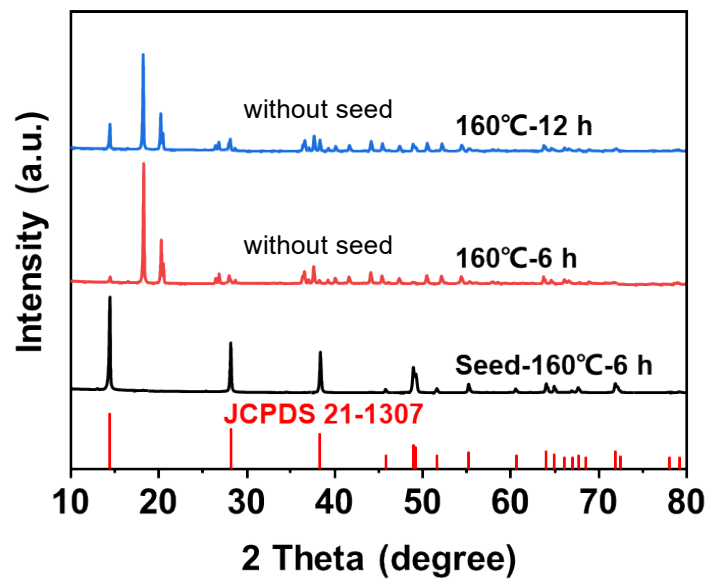

Fig. S4. XRD patterns of samples obtained under different reaction conditions.

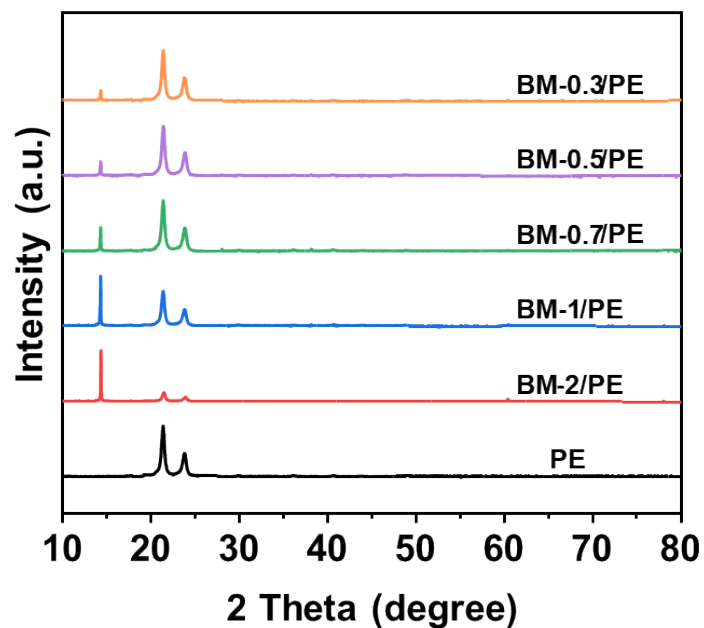

Fig. S5. XRD patterns of pure PE and BM/PE separators.

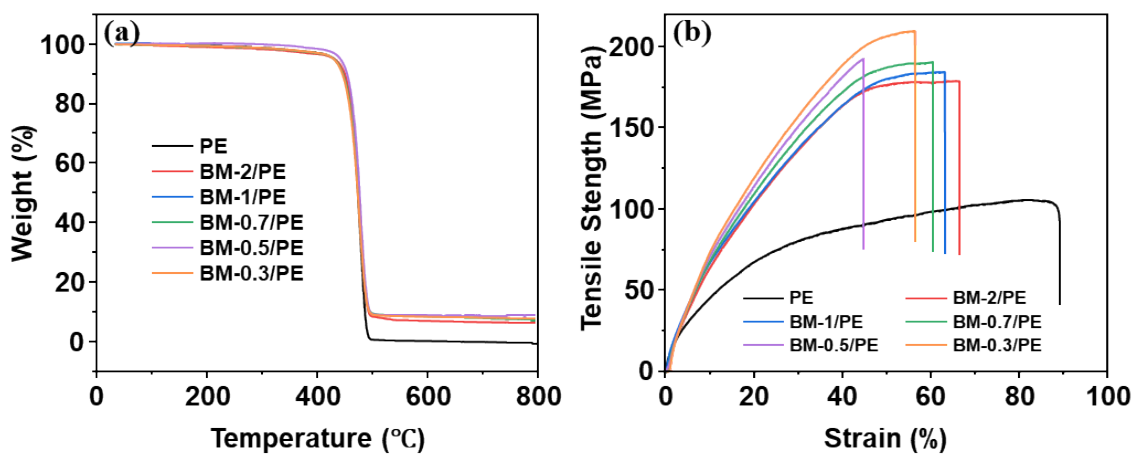

Fig. S6 (a) TGA curves and (b) Stress-strain curves of PE and BM-X/PE separators.

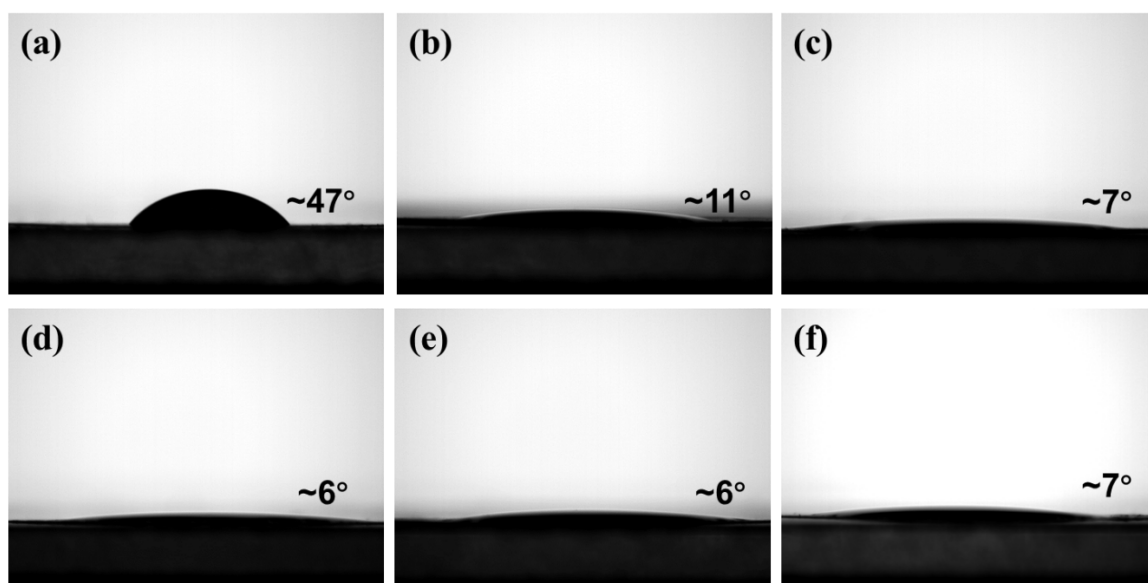

Fig. S7. Contact angle of (a) PE; (b) BM-2/PE; (c) BM-1/PE; (d) BM-0.7/PE; (e) BM-0.5/PE; (f) BM-0.3/PE separator.

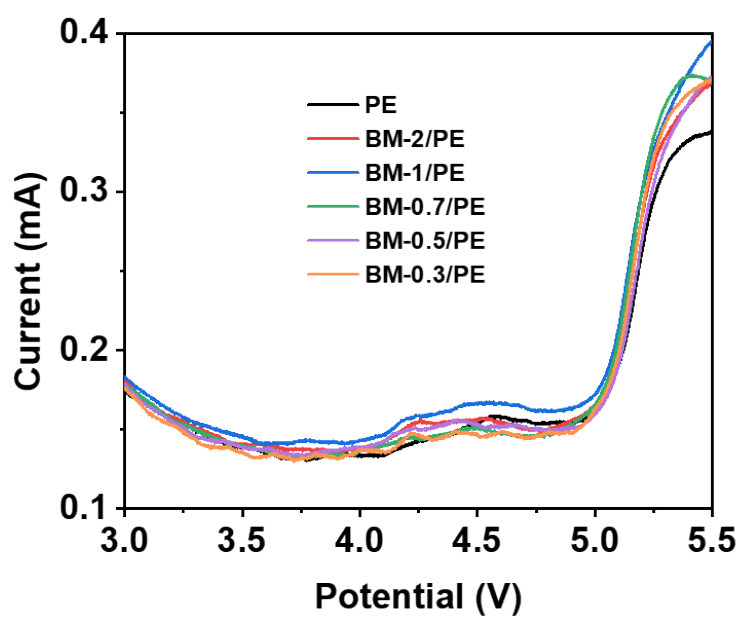

Fig. S8. LSV curves of batteries assembled with PE and BM-X/PE separators from 3 V to 5.5 V.
